# Supplementary material for: Human Organotypic Lung Tumor Models: Suitable For Preclinical 18F-FDG PET-Imaging
Source: PubMed Central journal article supplement (PMC4976941; doi:10.1371/journal.pone.0160282), 2016-08-08
Supplement: pone.0160282.s006.pdf [file pone.0160282.s006.pdf]

| Antigen                 | Dilution | Manufacturer and catalogue number        |
|-------------------------|----------|------------------------------------------|
| Primary Antibody        |          |                                          |
| β-catenin               | 1:100    | Abcam (ab32572)                          |
| Collagen I              | 1:100    | Acris Antibodies (BP8002S)               |
| Collagen IV             | 1:100    | Abcam (ab6586)                           |
| CD31                    | 1:6000   | DAKO Cytomation (M0823)                  |
| Fibronectin             | 1:100    | Abcam (ab23750)                          |
| E-cadherin              | 1:100    | BD Transduction Laboratories<br>(610181) |
| Elastin                 | 1:100    | Abcam (ab21610)                          |
| Glut1                   | 1:100    | Abcam (ab40084)                          |
| Ki67                    | 1:100    | Abcam (ab16667)                          |
| Mucin1                  | 1:100    | Imgenex (IMG-80045)                      |
| Pan Cytokeratin         | 1:100    | Sigma-Aldrich (C 2562-.2ML)              |
| Vimentin                | 1:100    | Abcam (ab92547)                          |
| Secondary Antibodies    |          |                                          |
| AlexaFluor555 dkamouse  | 1:400    | Invitrogen (A-31570)                     |
| AlexaFluor647 dkarabbit | 1:400    | Invitrogen (A-31573)                     |
