# Supplementary material for: Human Organotypic Lung Tumor Models: Suitable For Preclinical 18F-FDG PET-Imaging
Source: PubMed Central journal article supplement (PMC4976941; doi:10.1371/journal.pone.0160282), 2016-08-08
Supplement: pone.0160282.s007.pdf [file pone.0160282.s007.pdf]

| Specific tissue piece         | Method of analysis                          |
|-------------------------------|---------------------------------------------|
| <i>Part 1 top middle</i>      | <i>dsDNA, Collagen, Elastin measurement</i> |
| <i>Part 1 bottom distal</i>   | <i>dsDNA, Collagen, Elastin measurement</i> |
| <i>Part 1 bottom middle</i>   | <i>Histology</i>                            |
| <i>Part 2 top distal</i>      | <i>dsDNA, Collagen, Elastin measurement</i> |
| <i>Part 2 bottom proximal</i> | <i>dsDNA, Collagen, Elastin measurement</i> |
| <i>Part 2 bottom distal</i>   | <i>Histology</i>                            |
| <i>Part 3 left</i>            | <i>dsDNA, Collagen, Elastin measurement</i> |
| <i>Part 3 right</i>           | <i>Histology</i>                            |
| <i>Part 3 middle</i>          | <i>Ultrastructure (SEM, TEM)</i>            |
